# Supplementary material for: Polarization, second-order nonlinear optical properties and electrochromism in 4H-pyranylidene chromophores with a quinoid/aromatic thiophene ring bridge
Source: Royal Society of Chemistry journal article supplement (doi:10.1039/c4ra12791a), 2014-11-21
Supplement: c4ra12791a1.pdf [file c4ra12791a1.pdf]

RSC ADVANCES

ELECTRONIC SUPPLEMENTARY INFORMATION FOR

**Polarization, second-order nonlinear optical properties and electrochromism in 4*H*-pyranylidene chromophores with a quinoid/aromatic thiophene ring bridge.**

A. Belén Marco,<sup>a</sup> Paula Mayorga Burrezo,<sup>b</sup> Laura Mosteo,<sup>a</sup> Santiago Franco,<sup>a</sup> Javier Garín,<sup>a</sup> Jesús Orduna,<sup>a</sup> Beatriz E. Diosdado,<sup>c</sup> Belén Villacampa,<sup>d</sup> Juan T. López Navarrete,<sup>b</sup> Juan Casado\*<sup>b</sup> and Raquel Andreu\*<sup>a</sup>

<sup>a</sup> Departamento de Química Orgánica, ICMA, Universidad de Zaragoza-CSIC, 50009 Zaragoza, Spain.

<sup>b</sup> Departamento de Química Física, Universidad de Málaga, 29071 Málaga, Spain.

<sup>c</sup> Servicio de Difracción de Rayos X y Análisis por Fluorescencia, ICMA, Universidad de Zaragoza-CSIC. 50009 Zaragoza, Spain.

<sup>d</sup> Departamento de Física de la Materia Condensada, ICMA, Universidad de Zaragoza-CSIC, 50009 Zaragoza, Spain.

Corresponding autor: [randreu@unizar.es](mailto:randreu@unizar.es)

**TABLE OF CONTENTS**

|                                                         |               |
|---------------------------------------------------------|---------------|
| 1. General experimental methods                         | page S3       |
| 2. NMR spectra for new compounds                        |               |
| Figure S-1 (NMR spectra of compound <b>1a</b> )         | pages S5      |
| Figures S-2 to S-3 (NMR spectra of compound <b>1b</b> ) | pages S6-S7   |
| Figures S-4 to S-5 (NMR spectra of compound <b>1c</b> ) | pages S8-S9   |
| Figures S-6 to S-7 (NMR spectra of compound <b>2</b> )  | pages S10-S11 |

|                                          |               |
|------------------------------------------|---------------|
| <b>3. UV-Vis spectra</b>                 |               |
| Figures S-8 to S-11                      | pages S12-S15 |
| <b>4. X-Ray Diffraction</b>              |               |
| Compound <b>1c</b>                       | pages S16-S18 |
| Compound <b>2</b>                        | pages S19-S21 |
| <b>5. Voltammograms</b>                  |               |
| Figures S-18 to S-21                     | pages S22-S25 |
| <b>6. HRMS spectra for new compounds</b> | pages S26-S29 |
| Figures S-22 to S-25                     |               |
| <b>7. NLO measurements</b>               | page S30      |
| <b>8. Computational methods</b>          | pages S31-S34 |

## 1. General Experimental Methods

Infrared measurements were carried out in KBr using a Perkin-Elmer Fourier Transform Infrared 1600 spectrometer. Melting points were obtained on a Gallenkamp apparatus in open capillaries and are uncorrected.  $^1\text{H}$ - and  $^{13}\text{C}$ -NMR spectra were recorded on a Bruker ARX300 or a Bruker AV400 at 300 or 400 MHz and 75 or 100 MHz respectively;  $\delta$  values are given in ppm (relative to TMS) and  $J$  values in Hz. The apparent resonance multiplicity is described as a s (singlet), br s (broad singlet), d (doublet), t (triplet), q (quartet) and m (multiplet). Electrospray mass spectra were recorded on a Bruker Q-ToF spectrometer; accurate mass measurements were achieved using sodium formate as external reference. UV-Visible spectra were recorded with an UV-Vis UNICAM UV4 spectrophotometer. Cyclic voltammetry measurements were performed with a  $\mu$ -Autolab type III potentiostat using a glassy carbon working electrode, Pt counter electrode, and Ag/AgCl reference electrode. The experiments were carried out under argon in  $\text{CH}_2\text{Cl}_2$ , with  $\text{Bu}_4\text{NPF}_6$  as supporting electrolyte ( $0.1 \text{ mol L}^{-1}$ ). Scan rate was  $100 \text{ mV s}^{-1}$ . Elemental analyses were carried out with a Perkin-Elmer CHN2400 microanalyzer. 1064 nm FT-Raman spectra were obtained in an FT-Raman accessory kit (FRA/106-S) of a Bruker Equinox 55 FT-IR interferometer. A continuous-wave Nd-YAG laser working at 1064 nm was employed for excitation. A germanium detector operating at liquid nitrogen temperature was used. Raman scattering radiation was collected in a back-scattering configuration with a standard spectral resolution of  $4 \text{ cm}^{-1}$ . 2000 scans were averaged for each spectrum.

In situ UV-Vis-NIR spectroelectrochemical studies were conducted on a Cary 5000 spectrophotometer from Varian operating in a maximal 175–3300 nm range and FT-infrared spectra were taken using a Bruker Vertex 70 FTIR interferometer. In both case, a C3 epsilon potentiostat from BASi was used for the electrolysis using a thin layer cell from a demountable omni cell from Specac. In this cell a three electrodes system was coupled to conduct in situ spectroelectrochemistry. A Pt gauze was used as the working electrode, a Pt wire was used as the counter electrode, and an Ag wire was used as the pseudo-reference electrode. The spectra were collected a constant potential electrolysis and the potentials were changed in interval of 15 mV. The electrochemical medium used was 0.1 M  $\text{Bu}_4\text{NPF}_6$  in fresh distilled  $\text{CH}_2\text{Cl}_2$ , at room temperature with sample concentrations of  $10^{-3} \text{ M}$ .

X-Ray data collection was carried out on a Xcalibur, Sapphire 3 diffractometer equipped with a graphite monochromator (Mo $\kappa\alpha$  radiation,  $\lambda = 0.71073$  Å). The diffraction frames were integrated and corrected for absorption using the CrysAlisPro package.<sup>1</sup> The structures were solved using Superflip<sup>2</sup> and refined against the  $F^2$  data using full-matrix least squares methods with SHELXL-2013 (**1c**) and SHELXL-97 (**2**).<sup>3</sup> All non-hydrogen atoms were refined with anisotropic displacement parameters. All hydrogen atoms were placed at idealized positions and refined as riders with isotropic displacement parameters assigned as 1.2 times the  $U_{eq}$  value of the corresponding bonding partner (1.5 times for methyl hydrogen atoms).

---

<sup>1</sup> CrysAlisPro, Agilent Technologies, version 1.171.36.28 (release 01-02-2013 CrysAlis171.NET; compiled Feb 1 2013,16:14:44).

<sup>2</sup> L. Palatinus and G. Chapuis, *J. Appl. Cryst.*, 2007, **40**, 786–790. <http://superspace.epfl.ch/superflip>, Version: 04/17/13 12:45.

<sup>3</sup> G. M. Sheldrick, *Acta Crystallogr. A*, 2008, **64**, 112–122.

## 2. NMR spectra for new compounds

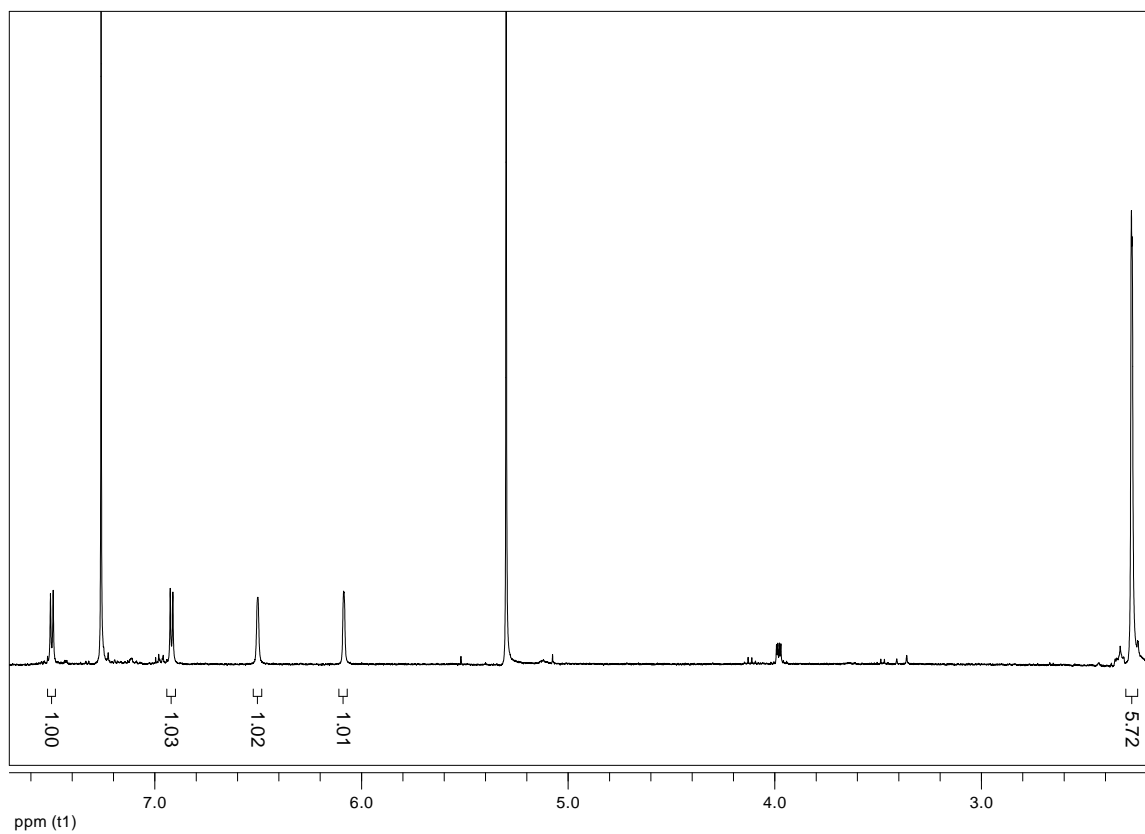

**Figure S-1:** <sup>1</sup>H-NMR spectrum of compound **1a** (400 MHz, CDCl<sub>3</sub>).

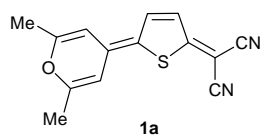

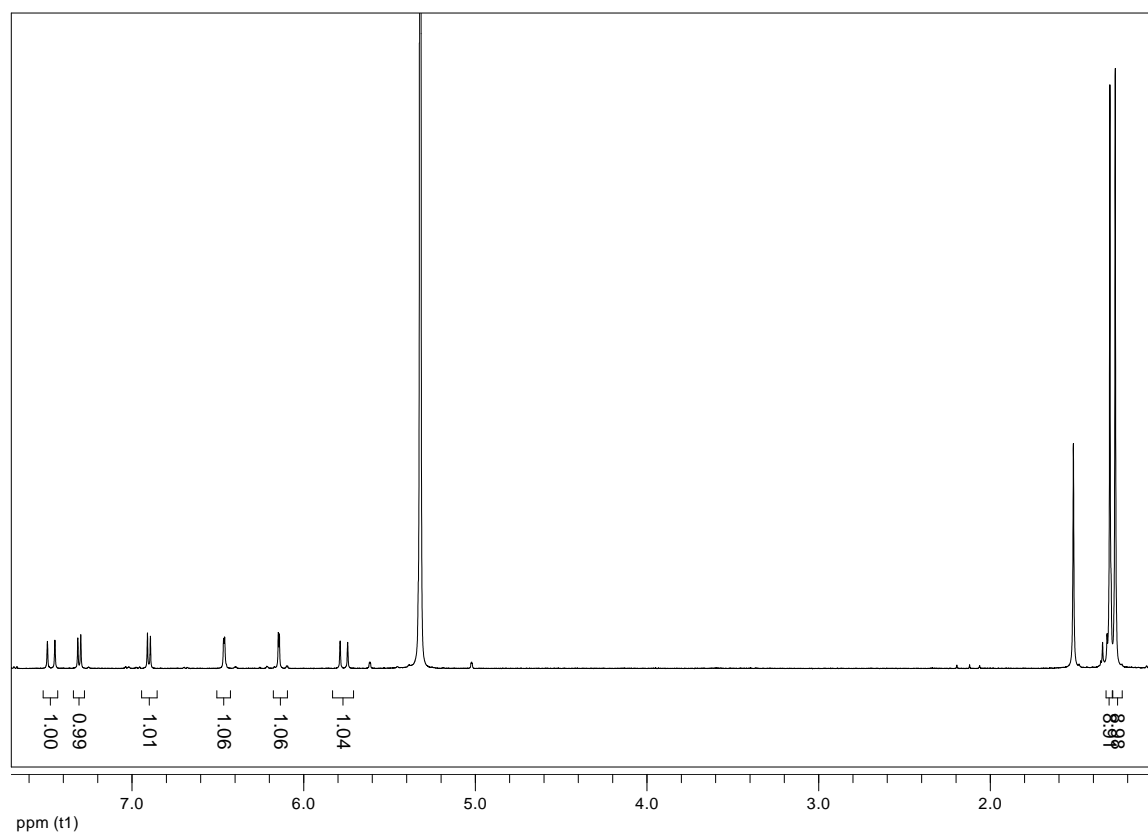

**Figure S-2:** <sup>1</sup>H-NMR spectrum of compound **1b** (300 MHz, CD<sub>2</sub>Cl<sub>2</sub>).

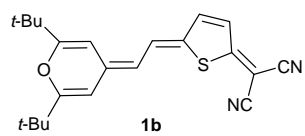

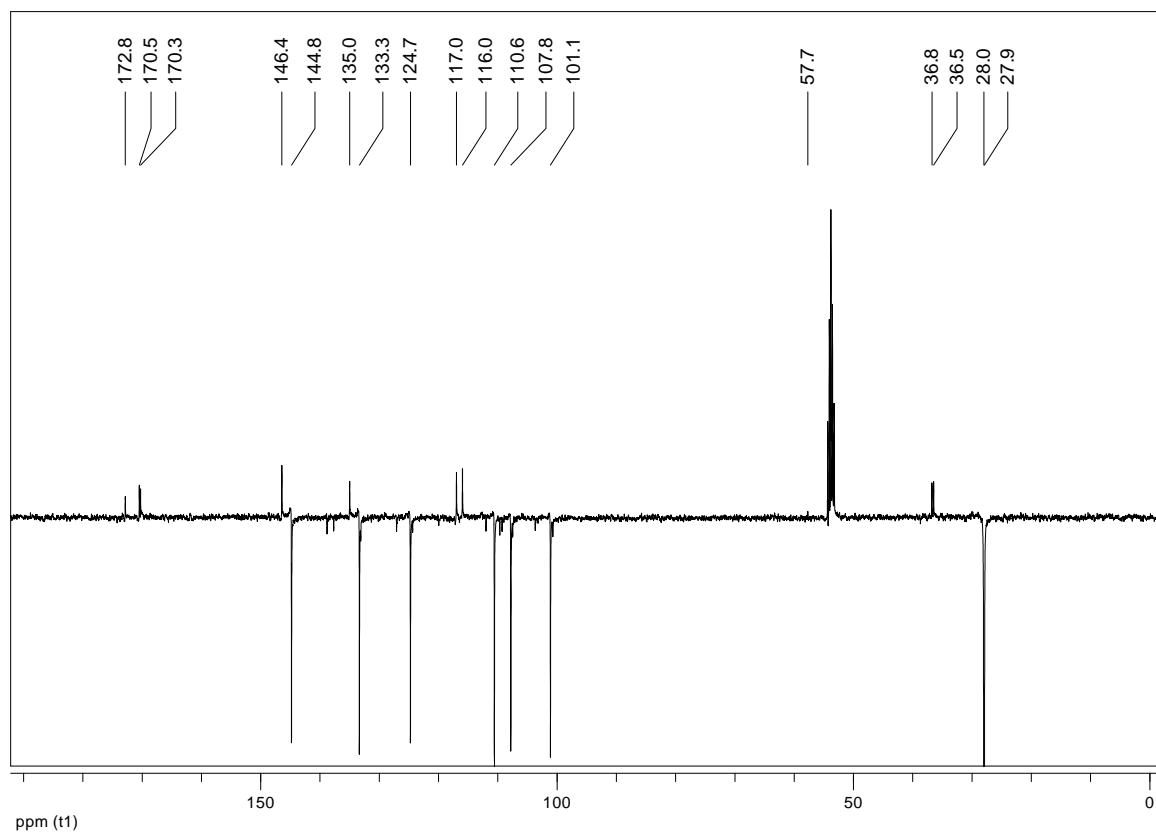

**Figure S-3:**  $^{13}\text{C}$ -NMR (APT) spectrum of compound **1b** (100 MHz,  $\text{CD}_2\text{Cl}_2$ ).

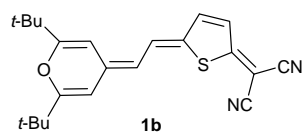

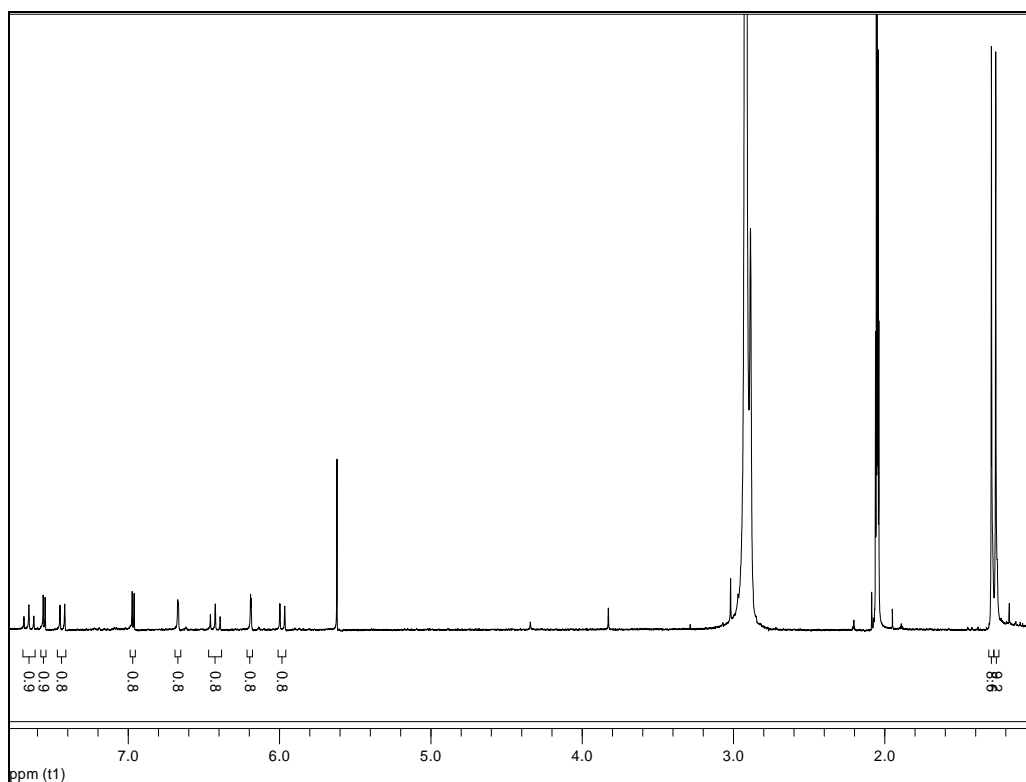

**Figure S-4:**  $^1\text{H}$ -NMR spectrum of compound **1c** (400 MHz,  $\text{CD}_3\text{COCD}_3$ ).

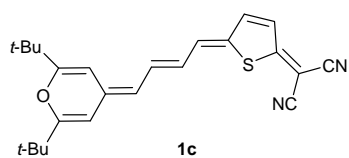



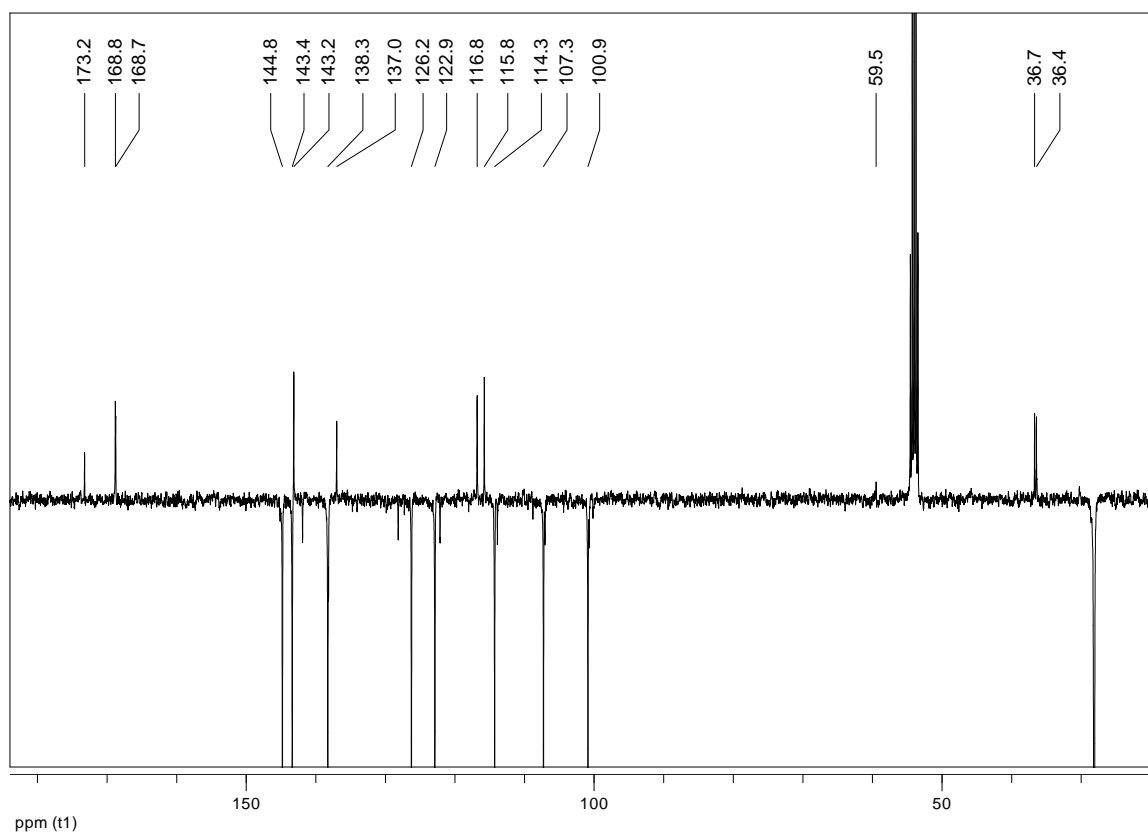

**Figure S-5:**  $^{13}\text{C}$ -NMR (APT) spectrum of compound **1c** (100 MHz,  $\text{CD}_2\text{Cl}_2$ ).

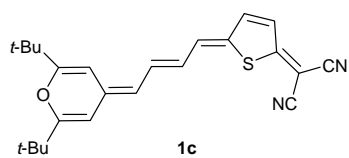

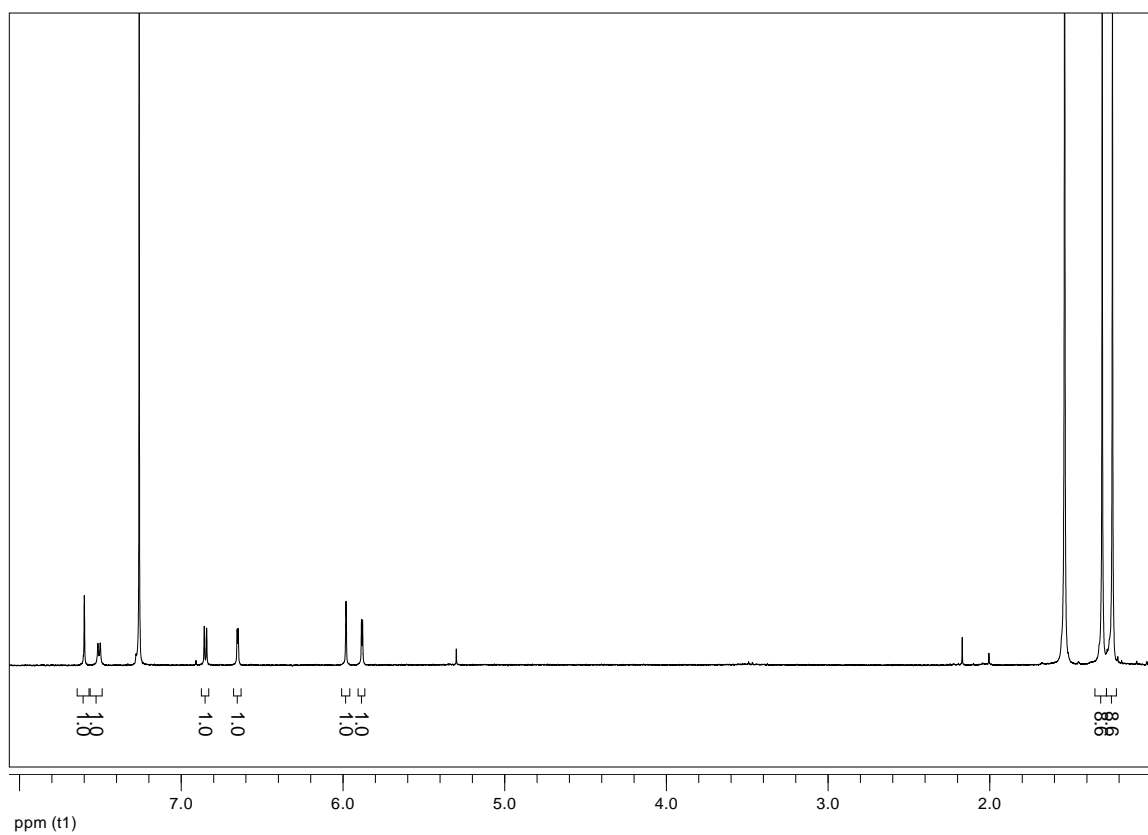

**Figure S-6:** <sup>1</sup>H-NMR spectrum of compound **2** (300 MHz, CDCl<sub>3</sub>).

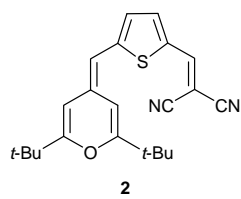

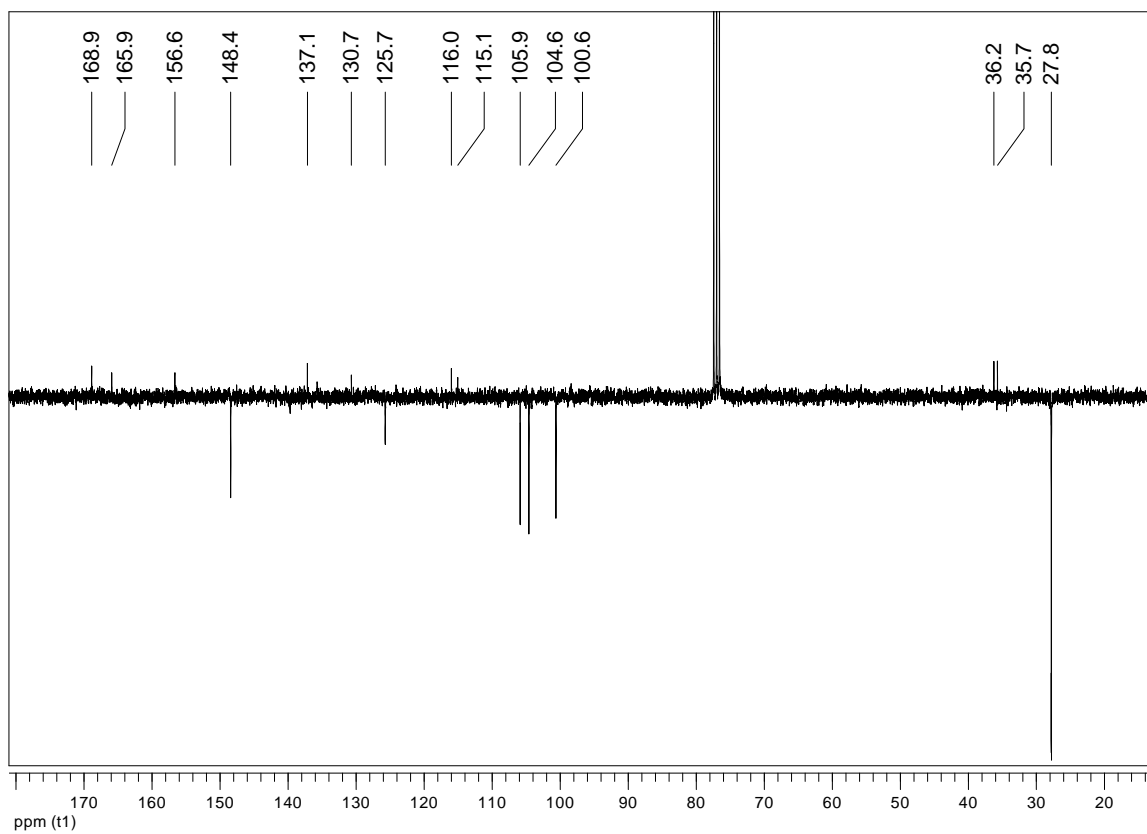

**Figure S-7:**  $^{13}\text{C}$ -NMR (APT) spectrum of compound **2** (75 MHz,  $\text{CDCl}_3$ ).

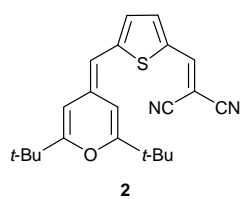

### 3. UV-Vis spectra

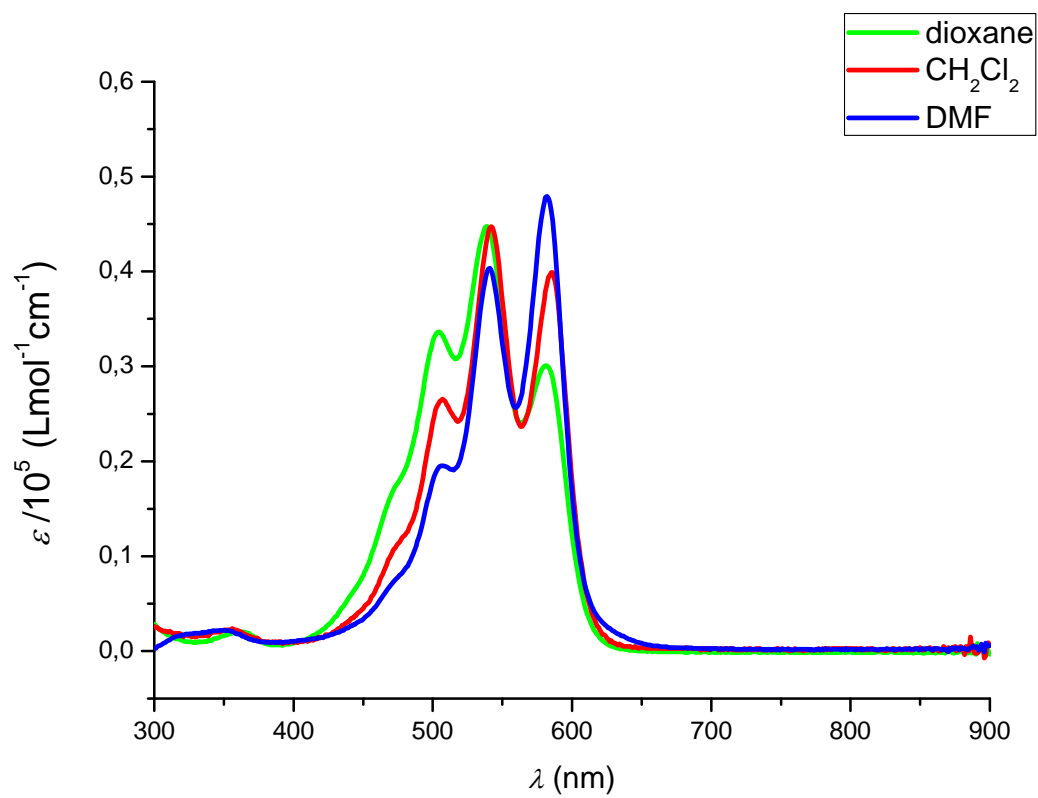

**Figure S-8:** UV-vis absorption spectra of compound **1a**.

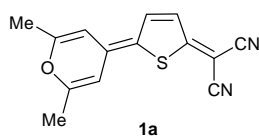

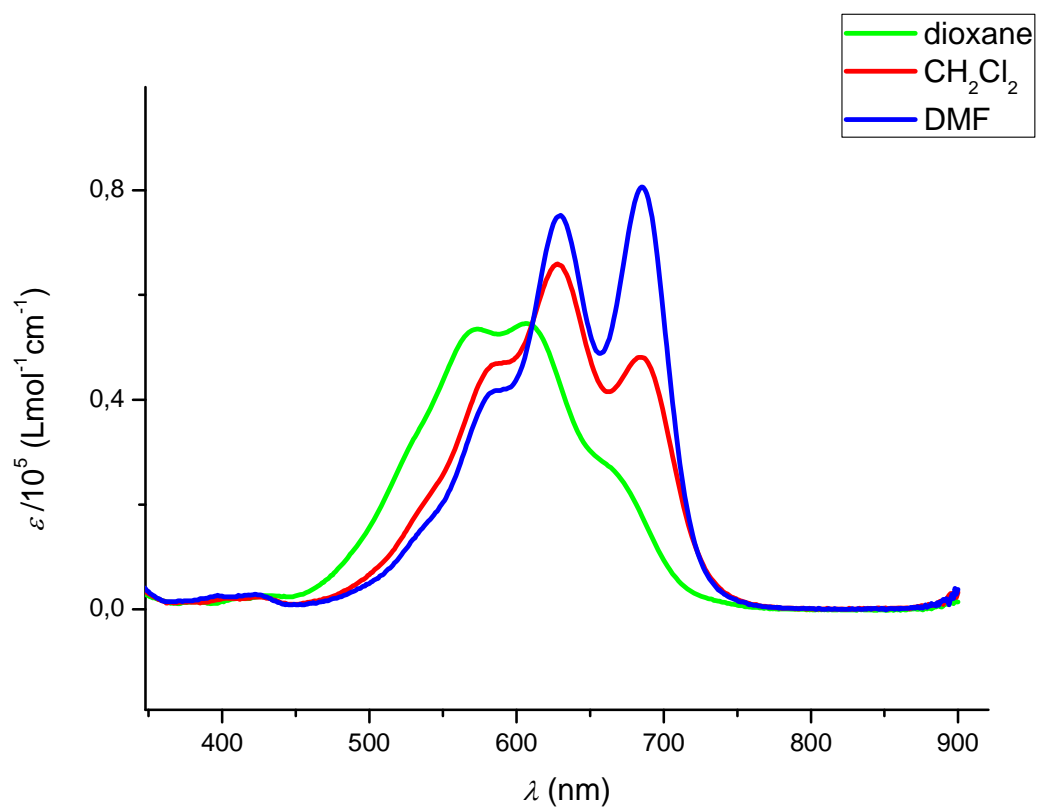

**Figure S-9:** UV-vis absorption spectra of compound **1b**.

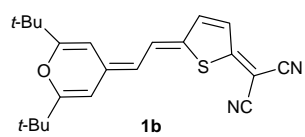

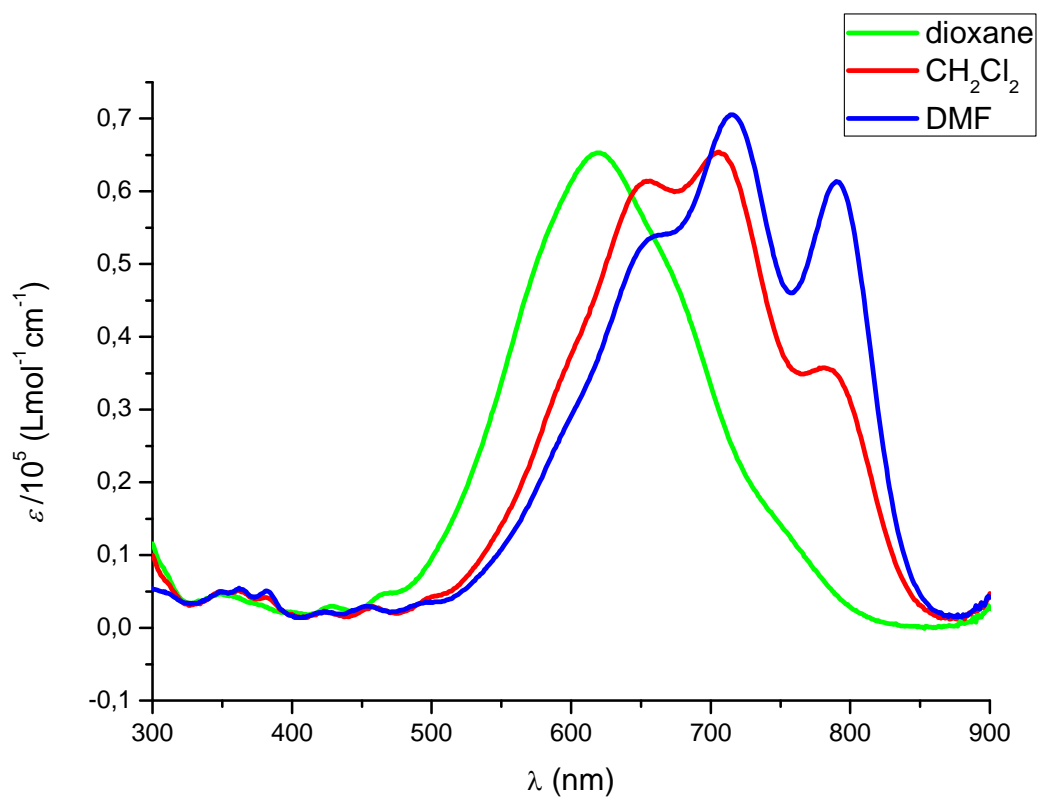

**Figure S-10:** UV-vis absorption spectra of compound **1c**.

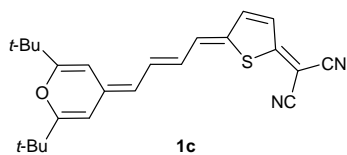

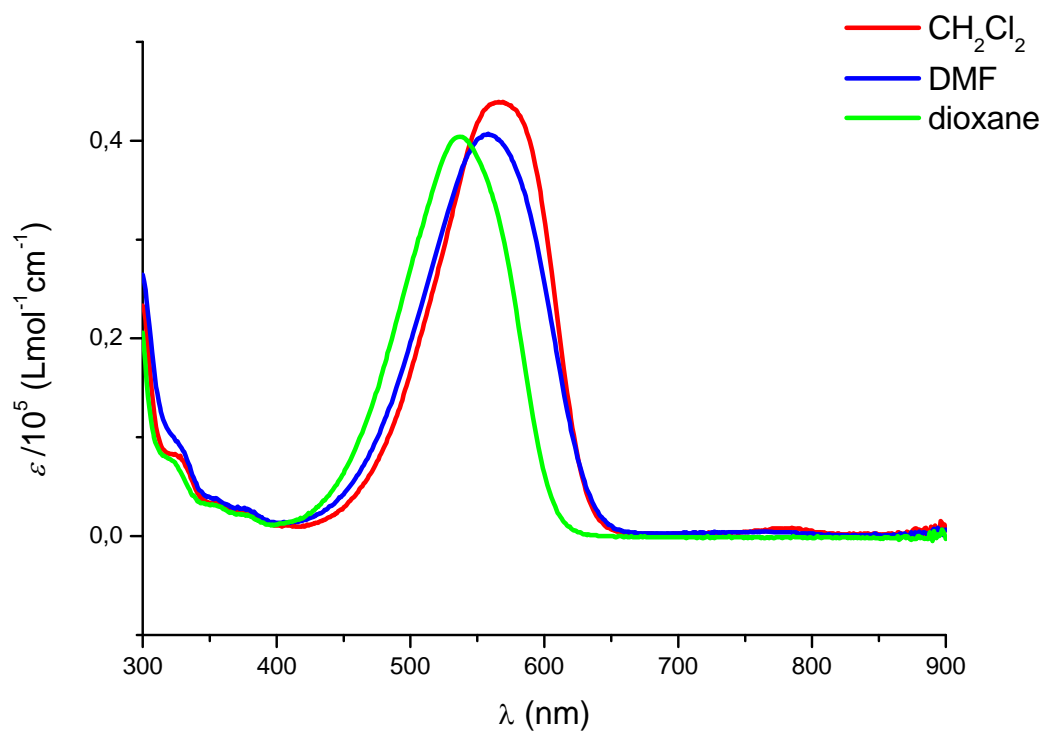

**Figure S-11:** UV-vis absorption spectra of compound **2**.

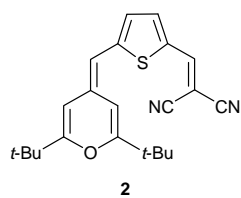

## 4. X-Ray Diffraction

*X-Ray crystal structure of compound 1c*: Single crystals were obtained by slow diffusion of hexane into a solution of **1c** in dichloromethane at room temperature: C<sub>24</sub>H<sub>26</sub>N<sub>2</sub>OS,  $M_r = 390.53$ , crystal dimensions  $0.45 \times 0.06 \times 0.05$  mm, orthorhombic space group *Pnma*,  $\rho_{\text{calcd}} = 1.215$  g cm<sup>-3</sup>,  $Z = 4$ ,  $a = 16.4908(5)$ ,  $b = 6.9106(3)$ ,  $c = 18.7394(6)$  Å,  $V = 2135.57(13)$  Å<sup>3</sup> at 150(1) K. Number of measured and unique reflections 13243 and 2021, respectively ( $R_{\text{int}}=0.0584$ ). Final  $R(F)=0.0451$ ,  $wR(F^2)=0.0865$  for 163 parameters and 1570 reflections with  $I > 2\sigma(I)$  (corresponding  $R$ -values based on all 2021 reflections 0.0699 and 0.0955).

### Crystal data and structure refinement for 1c.

|                                 |                                                                                                                       |
|---------------------------------|-----------------------------------------------------------------------------------------------------------------------|
| Identification code             | <b>1c</b>                                                                                                             |
| Empirical formula               | C <sub>24</sub> H <sub>26</sub> N <sub>2</sub> O S                                                                    |
| Formula weight                  | 390.53                                                                                                                |
| Temperature                     | 150(1) K                                                                                                              |
| Wavelength                      | 0.71073 Å                                                                                                             |
| Crystal system, space group     | Orthorhombic, <i>P n m a</i>                                                                                          |
| Unit cell dimensions            | $a = 16.4908(5)$ Å $\alpha = 90$ deg.<br>$b = 6.9106(3)$ Å $\beta = 90$ deg.<br>$c = 18.7394(6)$ Å $\gamma = 90$ deg. |
| Volume                          | 2135.57(13) Å <sup>3</sup>                                                                                            |
| $Z$ , Calculated density        | 4, 1.215 Mg/m <sup>3</sup>                                                                                            |
| Absorption coefficient          | 0.168 mm <sup>-1</sup>                                                                                                |
| $F(000)$                        | 832                                                                                                                   |
| Crystal size                    | 0.450 x 0.060 x 0.050 mm                                                                                              |
| Theta range for data collection | 3.142 to 24.998 deg.                                                                                                  |
| Limiting indices                | $-19 \leq h \leq 19$ , $-8 \leq k \leq 7$ , $-21 \leq l \leq 22$                                                      |
| Reflections collected / unique  | 13243 / 2021 [ $R_{\text{int}} = 0.0584$ ]                                                                            |
| Completeness to theta = 25.000  | 98.5 %                                                                                                                |
| Absorption correction           | Semi-empirical from equivalents                                                                                       |
| Max. and min. transmission      | 1.00000 and 0.96493                                                                                                   |



|                                      |                                       |
|--------------------------------------|---------------------------------------|
| Refinement method                    | Full-matrix least-squares on $F^2$    |
| Data / restraints / parameters       | 2021 / 0 / 163                        |
| Goodness-of-fit on $F^2$             | 1.084                                 |
| Final R indices [ $I > 2\sigma(I)$ ] | R1 = 0.0451, wR2 = 0.0865             |
| R indices (all data)                 | R1 = 0.0699, wR2 = 0.0955             |
| Extinction coefficient               | n/a                                   |
| Largest diff. peak and hole          | 0.261 and -0.254 e. $\text{\AA}^{-3}$ |

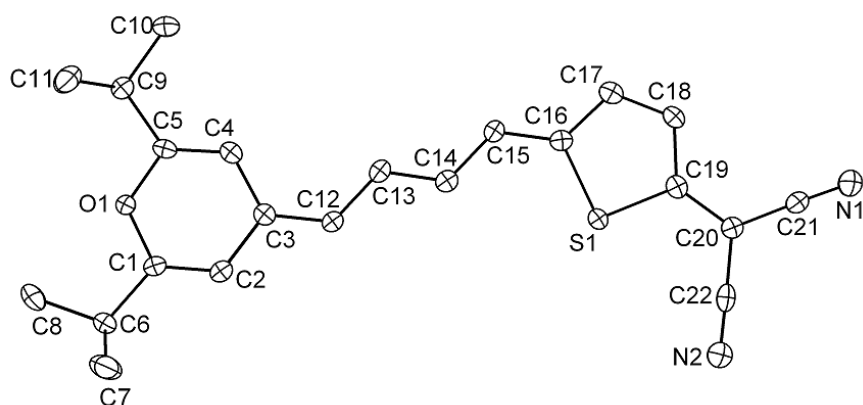

**Figure S-12:** ORTEP view of **1c**.

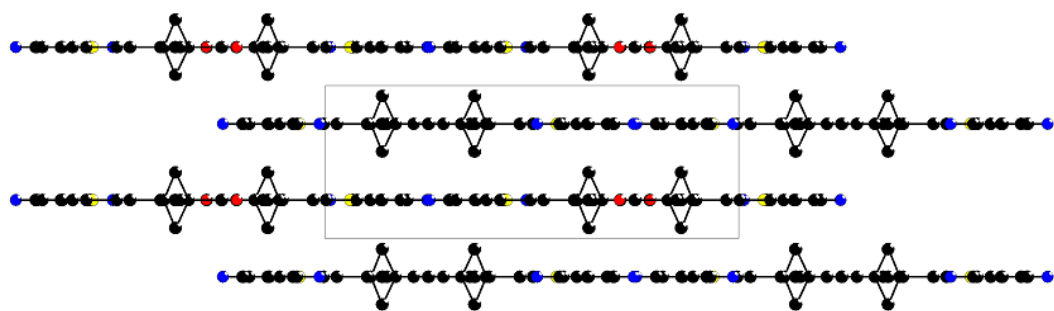

**Figure S-13:** Crystal packing of **1c** viewed along the  $[100]$  direction.

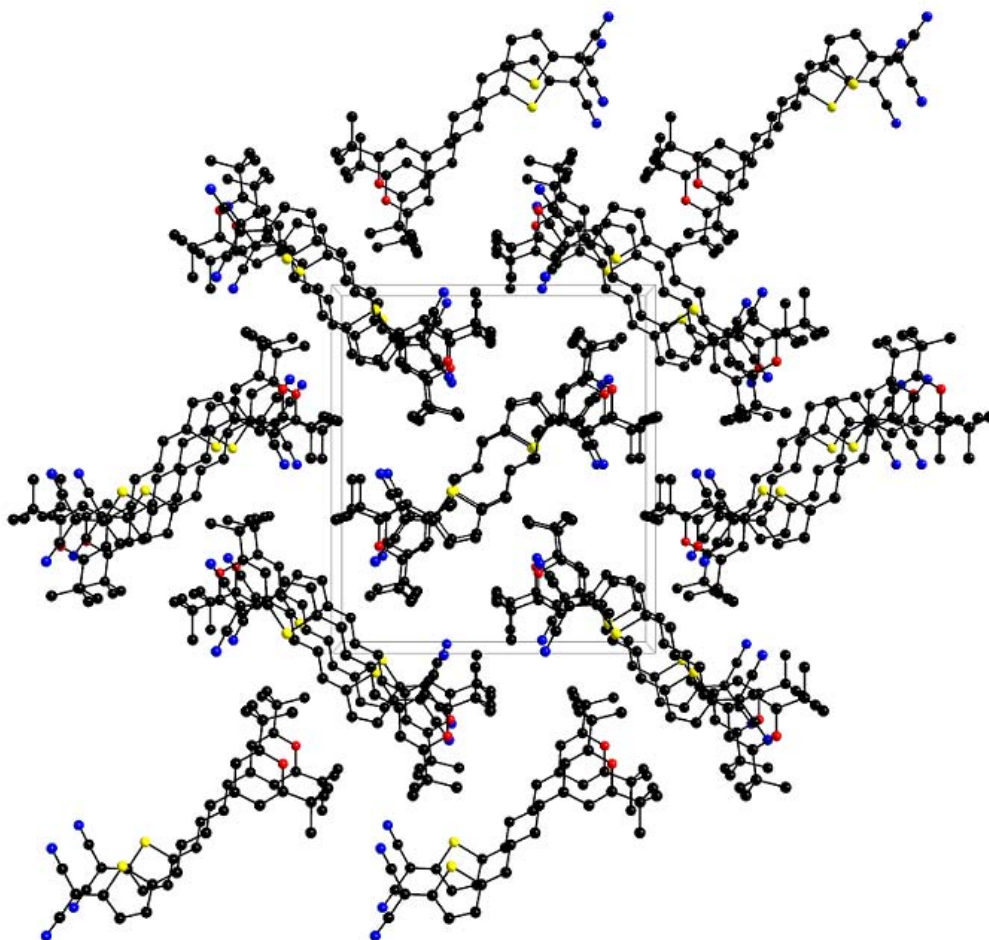

**Figure S-14:** Crystal packing of **1c** viewed along the [010] direction.

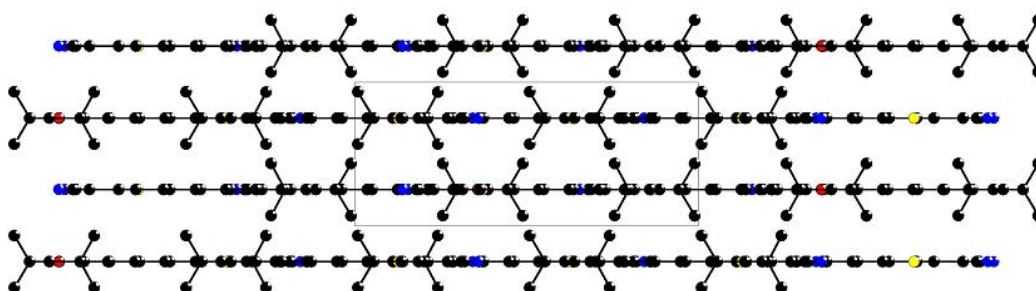

**Figure S-15:** Crystal packing of **1c** viewed along the [001] direction.

## Compound 2

*X-Ray crystal structure of compound 2:* Single crystals were obtained by slow diffusion of hexane into a solution of **2** in dichloromethane at room temperature: C<sub>22</sub>H<sub>24</sub>N<sub>2</sub>OS.  $M_r = 364.49$ , crystal dimensions  $0.42 \times 0.06 \times 0.02$  mm, monoclinic space group  $P21/m$ ,  $\rho_{\text{calcd}} = 1.168 \text{ g cm}^{-3}$ ,  $Z = 2$ ,  $a = 9.1986(13)$ ,  $b = 6.8265(10)$ ,  $c = 17.101(3) \text{ \AA}$ ,  $\beta = 105.222(16)$ ,  $V = 1036.2(3) \text{ \AA}^3$  at  $150(1) \text{ K}$ . Number of measured and unique reflections 11105 and 1945, respectively ( $R_{\text{int}} = 0.1603$ ).

### Crystal data and structure refinement for 2.

|                                  |                                                                                                                                                                                    |
|----------------------------------|------------------------------------------------------------------------------------------------------------------------------------------------------------------------------------|
| Identification code              | <b>2</b>                                                                                                                                                                           |
| Empirical formula                | C <sub>22</sub> H <sub>24</sub> N <sub>2</sub> O S                                                                                                                                 |
| Formula weight                   | 364.49                                                                                                                                                                             |
| Temperature                      | 150(1) K                                                                                                                                                                           |
| Wavelength                       | 0.71073 \AA                                                                                                                                                                        |
| Crystal system, space group      | Monoclinic, $P21/m$                                                                                                                                                                |
| Unit cell dimensions             | $a = 9.1986(13) \text{ \AA}$ $\alpha = 90\text{deg.}$<br>$b = 6.8265(10) \text{ \AA}$ $\beta = 105.222(16) \text{ deg.}$<br>$c = 17.101(3) \text{ \AA}$ $\gamma = 90 \text{ deg.}$ |
| Volume                           | $1036.2(3) \text{ \AA}^3$                                                                                                                                                          |
| $Z$ , Calculated density         | 2, 1.168 Mg/m <sup>3</sup>                                                                                                                                                         |
| Absorption coefficient           | $0.168 \text{ mm}^{-1}$                                                                                                                                                            |
| $F(000)$                         | 388                                                                                                                                                                                |
| Crystal size                     | $0.42 \times 0.06 \times 0.02 \text{ mm}$                                                                                                                                          |
| Theta range for data collection  | 3.23 to 24.98 deg.                                                                                                                                                                 |
| Limiting indices                 | $-10 \leq h \leq 10$ , $-8 \leq k \leq 8$ , $-19 \leq l \leq 20$                                                                                                                   |
| Reflections collected / unique   | 11105 / 1945 [ $R_{\text{int}} = 0.1603$ ]                                                                                                                                         |
| Completeness to $\theta = 24.98$ | 97.6 %                                                                                                                                                                             |
| Absorption correction            | Semi-empirical from equivalents                                                                                                                                                    |
| Max. and min. transmission       | 0.9966 and 0.9327                                                                                                                                                                  |

|                                   |                                             |
|-----------------------------------|---------------------------------------------|
| Refinement method                 | Full-matrix least-squares on F <sup>2</sup> |
| Data / restraints / parameters    | 1945 / 0 / 151                              |
| Goodness-of-fit on F <sup>2</sup> | 1.042                                       |
| Final R indices [I>2sigma(I)]     | R1 = 0.1046, wR2 = 0.2063                   |
| R indices (all data)              | R1 = 0.1895, wR2 = 0.2475                   |
| Largest diff. peak and hole       | 0.486 and -0.279 e.A <sup>-3</sup>          |

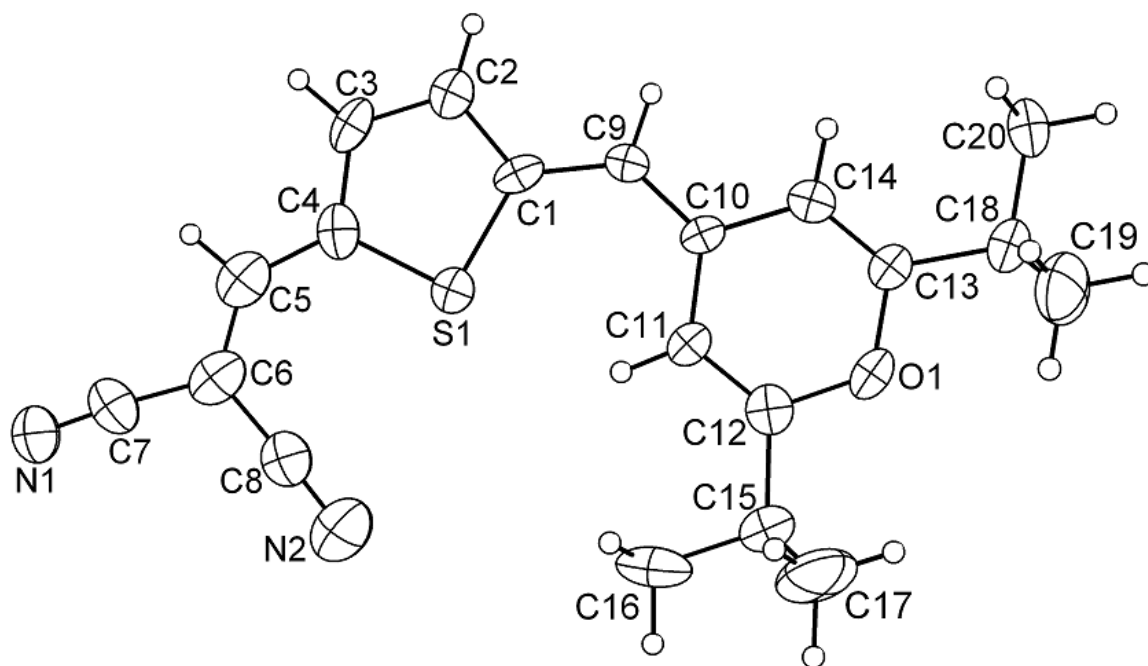

**Figure S-16:** ORTEP view of **2**.

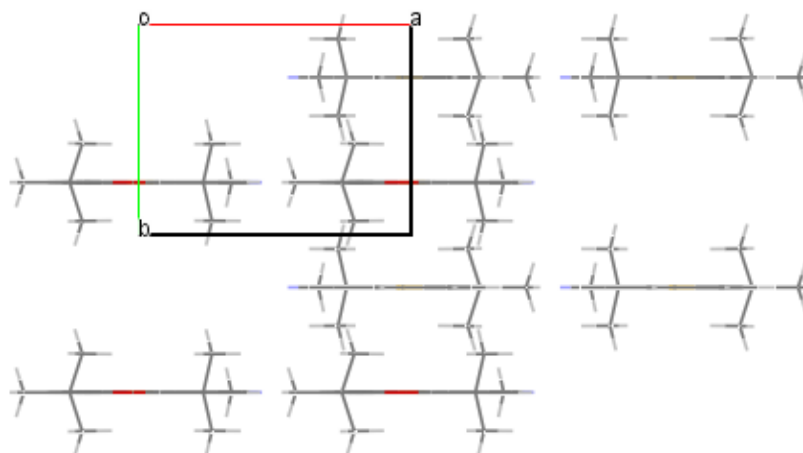

**Figure S-17:** Crystal packing of **2** viewed along the [001] direction.

## 5. Voltammograms

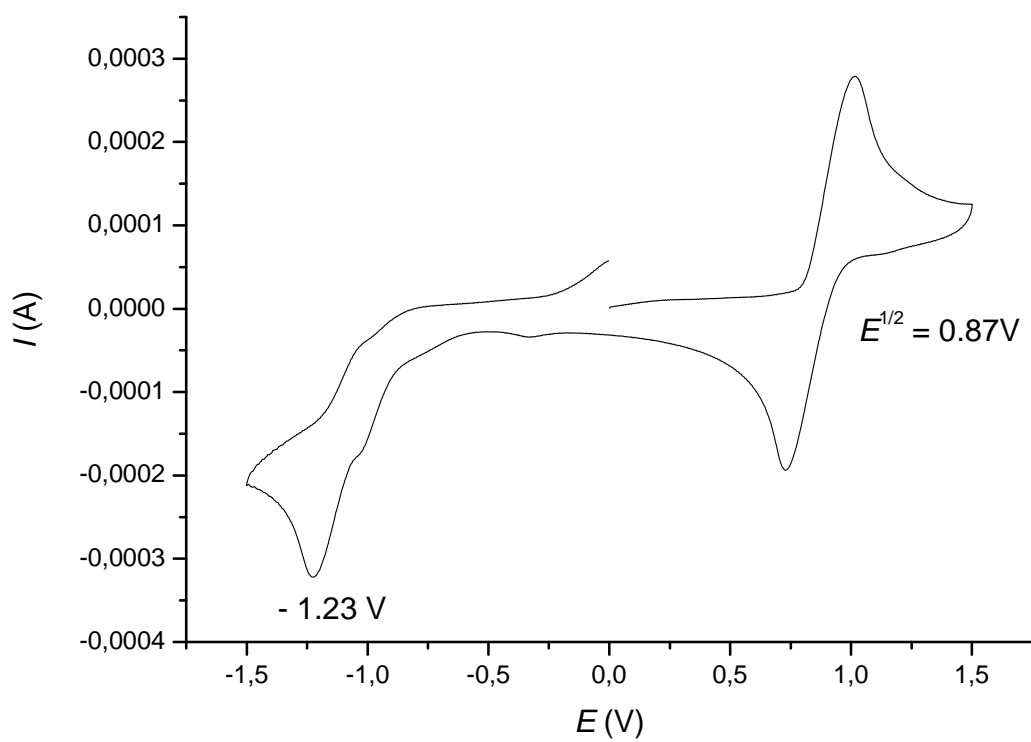

**Figure S-18:** Voltammogram of compound **1a**.

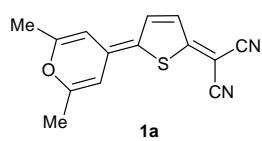

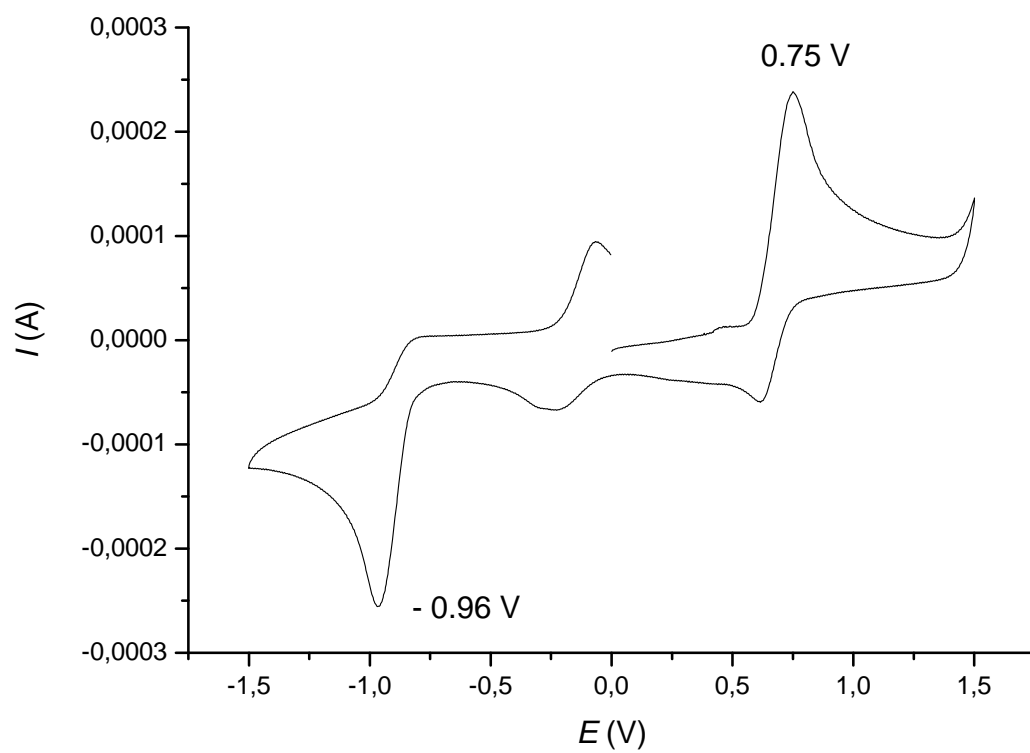

**Figure S-19:** Voltammogram of compound **1b**.

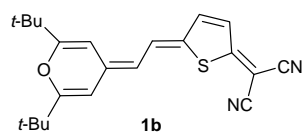

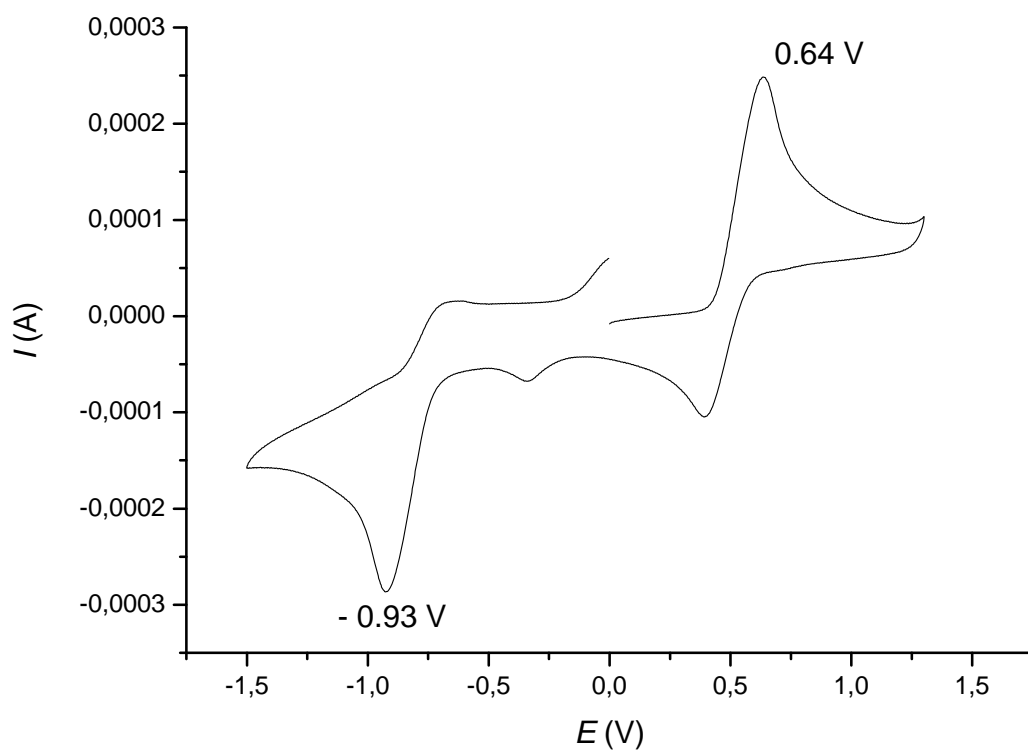

**Figure S-20:** Voltammogram of compound **1c**.

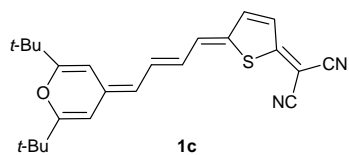



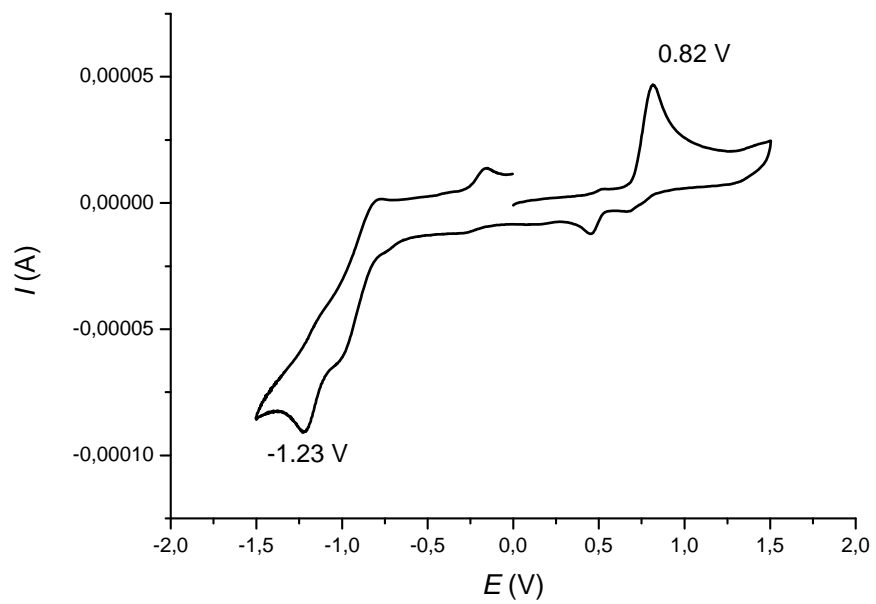

**Figure S-21:** Voltammogram of compound **2**.

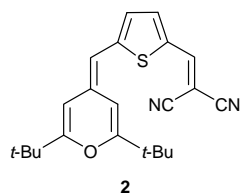

## 6. HRMS spectra of new compounds

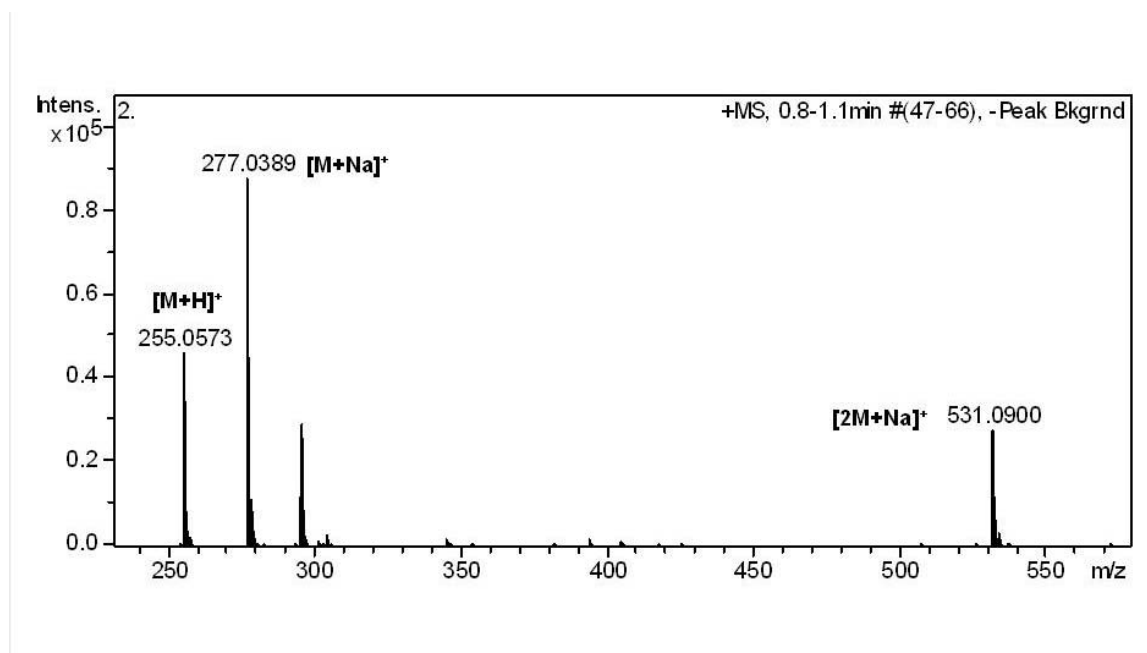

Figure S-22: HRMS spectra (ESI<sup>+</sup>) of compound 1a.

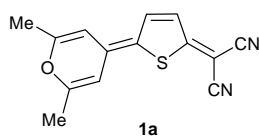

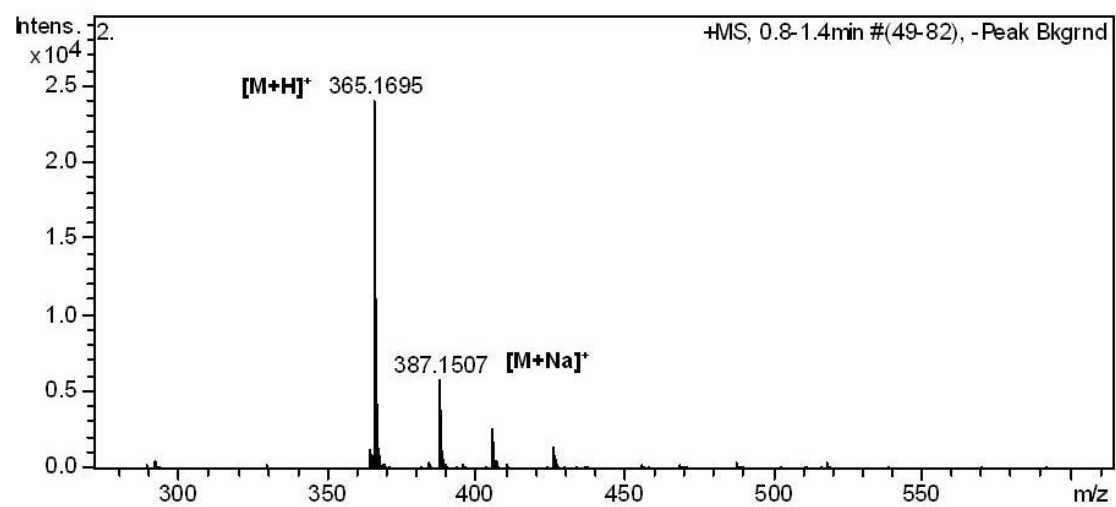

**Figure S-23:** HRMS spectra (ESI<sup>+</sup>) of compound **1b**.

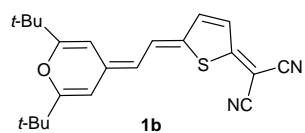

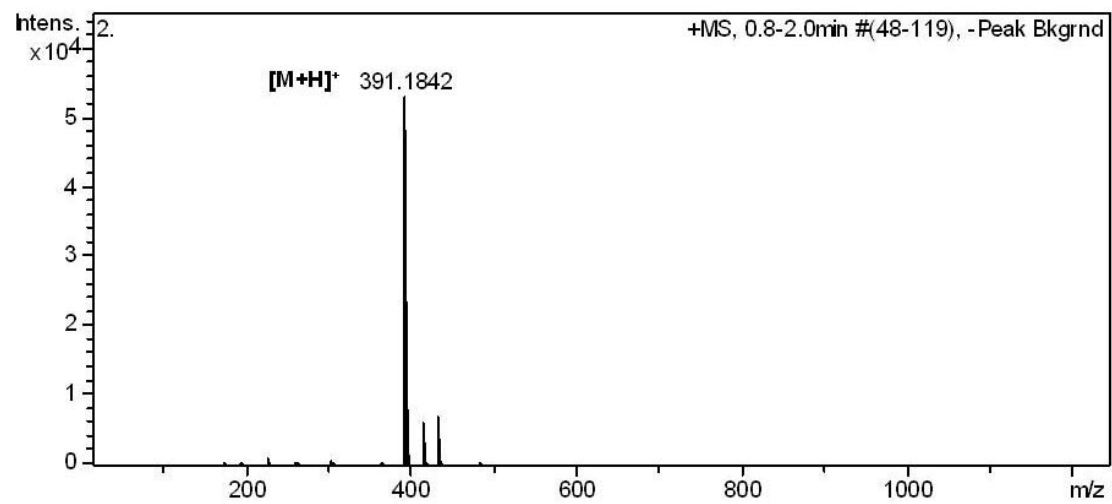

**Figure S-24:** HRMS spectra (ESI<sup>+</sup>) of compound **1c**.

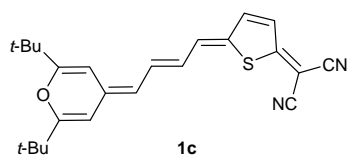

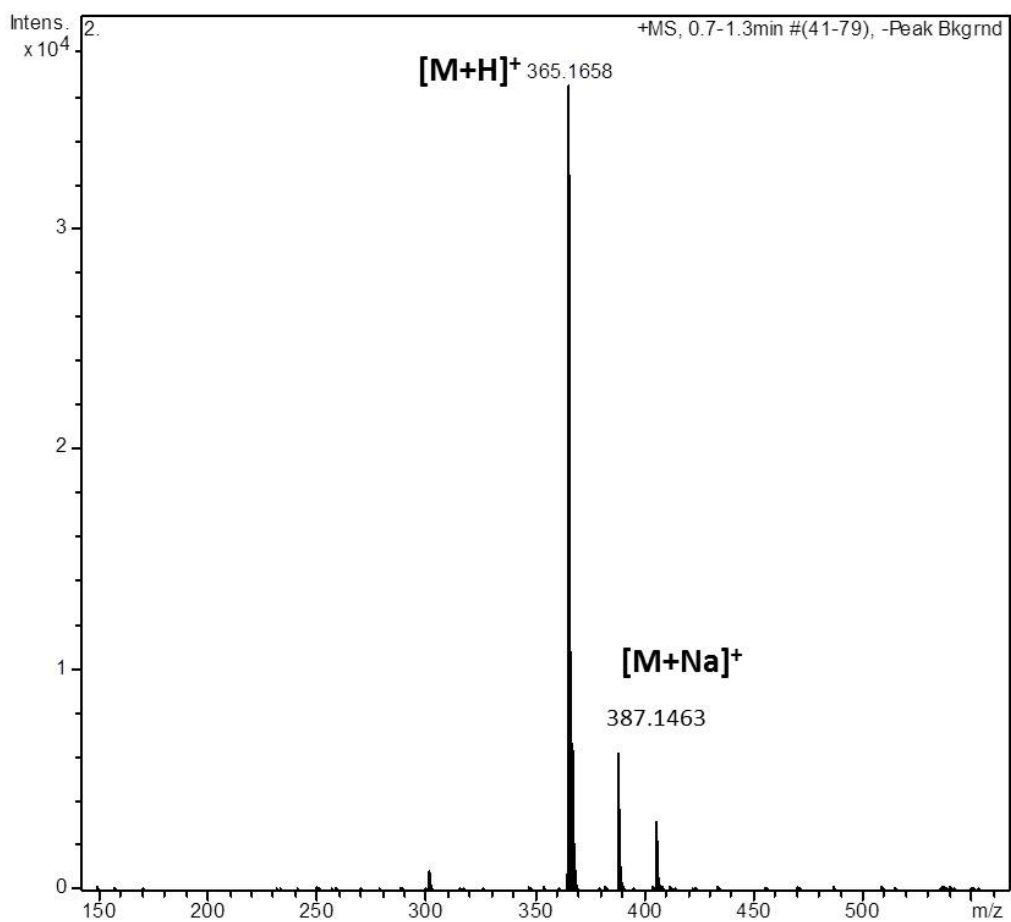

**Figure S-25:** HRMS spectra (ESI<sup>+</sup>) of compound **2**.

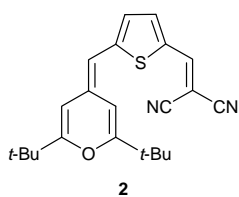

## 7. NLO measurements

Electric field induced second harmonic generation (EFISH) measurements have been performed using as the fundamental radiation the 1.9  $\mu\text{m}$  output of a  $\text{H}_2$  Raman shifter pumped by a Q-switched Nd:YAG laser. This laser operates at 1064 nm, with a repetition rate of 10 Hz and pulse width of 8 ns. A computer controlled NLO spectrometer completes the SHG experimental set-up. The 1.9  $\mu\text{m}$  incident light is split in two beams. The less intense one is directed to a *N*-(4-nitrophenyl)-(*L*)-prolinol (NPP) powder sample whose SH signal is used as a reference in order to reduce the effects of laser fluctuations. The second one is passed through a linear (vertical) polarizer and focused into the EFISH wedge shaped liquid cell. Voltage pulses of 5 kV and 3  $\mu\text{s}$  are applied across the cell (2 mm gap between the electrodes) synchronously with the laser pulses. The harmonic signals from both the EFISH cell and the NPP reference are measured with two photomultipliers. Interference filters are used to remove the residual excitation light beyond the sample and the reference.

The molecular  $\mu\beta$  values of the reported compounds have been determined in dichloromethane. Several solutions of concentration in the range  $10^{-3}$ – $10^{-4}$  M were measured.

## 8.- Computational Methods

Theoretical calculations were performed using Gaussian 09,<sup>[4]</sup> and the default parameters provided by this software package. All the calculations performed estimated solvent effects by using a Polarizable Continuum Model (PCM).<sup>[5]</sup> Equilibrium geometries in solution were obtained using the M06-2x hybrid meta-GGA exchange-correlation functional<sup>[6]</sup> and the medium size 6-31G\* basis set.<sup>[7]</sup> Mulliken charges and molecular orbital energies were calculated by single point calculations using the 6-311+G(2d,p) basis set. Vertical excitation energies were calculated by time-dependent single point calculations using the M06-2x/6-311+G(2d,p) model chemistry. Molecular Orbital contour plots were obtained using the Avogadro software<sup>[8]</sup> at 0.04 isosurface value.

### Calculated Equilibrium Geometries and Energies. (PCM-M06-2x/6-31G\* in dichloromethane)

#### 1a

Standard orientation:

| Center Number | Atomic Number | Atomic Type | Coordinates (Angstroms) |           |           |
|---------------|---------------|-------------|-------------------------|-----------|-----------|
|               |               |             | X                       | Y         | Z         |
| 1             | 6             | 0           | 2.436603                | -0.305989 | -0.000007 |
| 2             | 6             | 0           | 1.958584                | -1.646923 | -0.000012 |
| 3             | 6             | 0           | 0.590955                | -1.730369 | -0.000023 |
| 4             | 6             | 0           | -0.078653               | -0.483085 | -0.000030 |
| 5             | 1             | 0           | 2.632899                | -2.494480 | -0.000004 |
| 6             | 16            | 0           | 1.115300                | 0.823578  | -0.000024 |
| 7             | 6             | 0           | 3.768439                | 0.109381  | 0.000007  |
| 8             | 6             | 0           | 4.811730                | -0.853234 | 0.000023  |
| 9             | 7             | 0           | 5.647525                | -1.660254 | 0.000039  |
| 10            | 6             | 0           | 4.106465                | 1.486961  | 0.000009  |
| 11            | 7             | 0           | 4.342417                | 2.624819  | 0.000011  |
| 12            | 6             | 0           | -1.444776               | -0.240421 | -0.000025 |
| 13            | 6             | 0           | -1.996744               | 1.086256  | -0.000022 |
| 14            | 6             | 0           | -2.415474               | -1.301220 | -0.000022 |
| 15            | 6             | 0           | -3.334869               | 1.283209  | 0.000010  |
| 16            | 1             | 0           | -1.353813               | 1.959030  | -0.000043 |
| 17            | 6             | 0           | -3.739312               | -1.028759 | 0.000010  |
| 18            | 1             | 0           | -2.110529               | -2.339716 | -0.000041 |

<sup>[4]</sup> Gaussian 09, Revision A.2, Frisch, M. J.; Trucks, G. W.; Schlegel, H. B.; Scuseria, G. E.; Robb, M. A.; Cheeseman, J. R.; Scalmani, G.; Barone, V.; Mennucci, B.; Petersson, G. A.; Nakatsuji, H.; Caricato, M.; Li, X.; Hratchian, H. P.; Izmaylov, A. F.; Bloino, J.; Zheng, G.; Sonnenberg, J. L.; Hada, M.; Ehara, M.; Toyota, K.; Fukuda, R.; Hasegawa, J.; Ishida, M.; Nakajima, T.; Honda, Y.; Kitao, O.; Nakai, H.; Vreven, T.; Montgomery, Jr., J. A.; Peralta, J. E.; Ogliaro, F.; Bearpark, M.; Heyd, J. J.; Brothers, E.; Kudin, K. N.; Staroverov, V. N.; Kobayashi, R.; Normand, J.; Raghavachari, K.; Rendell, A.; Burant, J. C.; Iyengar, S. S.; Tomasi, J.; Cossi, M.; Rega, N.; Millam, N. J.; Klene, M.; Knox, J. E.; Cross, J. B.; Bakken, V.; Adamo, C.; Jaramillo, J.; Gomperts, R.; Stratmann, R. E.; Yazyev, O.; Austin, A. J.; Cammi, R.; Pomelli, C.; Ochterski, J. W.; Martin, R. L.; Morokuma, K.; Zakrzewski, V. G.; Voth, G. A.; Salvador, P.; Dannenberg, J. J.; Dapprich, S.; Daniels, A. D.; Farkas, Ö.; Foresman, J. B.; Ortiz, J. V.; Cioslowski, J.; Fox, D. J. Gaussian, Inc., Wallingford CT, 2009.

<sup>[5]</sup> J. Tomasi, B. Mennucci and R. Cammi, *Chem. Rev.*, 2005, **105**, 2999–3093.

<sup>[6]</sup> Y. Zhao and D. G. Truhlar, *Theor. Chem. Acc.*, 2008, **120**, 215–241.

<sup>[7]</sup> P. C. Hariharan and J. A. Pople, *Theor. Chim. Acta*, 1973, **28**, 213–222.

<sup>[8]</sup> M. D. Hanwell, D. E. Curtis, D. C. Lonie, T. Vandermeersch, E. Zurek and G. R. Hutchison, *J. Cheminf.*, 2012, 4:17.

|    |   |   |           |           |           |
|----|---|---|-----------|-----------|-----------|
| 19 | 8 | 0 | -4.201405 | 0.244909  | 0.000037  |
| 20 | 6 | 0 | -4.035976 | 2.596778  | 0.000013  |
| 21 | 6 | 0 | -4.847523 | -2.023482 | 0.000021  |
| 22 | 1 | 0 | 0.058634  | -2.675015 | -0.000027 |
| 23 | 1 | 0 | -3.315666 | 3.414759  | 0.000050  |
| 24 | 1 | 0 | -4.674971 | 2.677807  | -0.884282 |
| 25 | 1 | 0 | -4.675027 | 2.677774  | 0.884270  |
| 26 | 1 | 0 | -5.476169 | -1.882622 | 0.884349  |
| 27 | 1 | 0 | -5.476212 | -1.882591 | -0.884272 |
| 28 | 1 | 0 | -4.448990 | -3.038036 | -0.000006 |

-----  
E(RM062X) = -1122.04903014      A.U.

## **1b**

Standard orientation:

| Center<br>Number | Atomic<br>Number | Atomic<br>Type | Coordinates (Angstroms) |           |           |
|------------------|------------------|----------------|-------------------------|-----------|-----------|
|                  |                  |                | X                       | Y         | Z         |
| 1                | 6                | 0              | 5.007702                | -0.268682 | -0.000182 |
| 2                | 6                | 0              | 4.769904                | -1.673893 | -0.000627 |
| 3                | 6                | 0              | 3.437837                | -1.988797 | -0.000663 |
| 4                | 6                | 0              | 2.563241                | -0.872003 | -0.000268 |
| 5                | 1                | 0              | 5.582612                | -2.390001 | -0.000899 |
| 6                | 16               | 0              | 3.509969                | 0.621798  | 0.000147  |
| 7                | 6                | 0              | 6.247831                | 0.366672  | -0.000006 |
| 8                | 6                | 0              | 7.440591                | -0.404786 | -0.000293 |
| 9                | 7                | 0              | 8.401381                | -1.057436 | -0.000530 |
| 10               | 6                | 0              | 6.349596                | 1.781867  | 0.000511  |
| 11               | 7                | 0              | 6.394281                | 2.942906  | 0.000955  |
| 12               | 6                | 0              | -1.069090               | 0.100048  | 0.000139  |
| 13               | 6                | 0              | -1.865388               | 1.298265  | 0.000343  |
| 14               | 6                | 0              | -1.819666               | -1.128517 | -0.000020 |
| 15               | 6                | 0              | -3.216491               | 1.245053  | 0.000206  |
| 16               | 1                | 0              | -1.370467               | 2.261498  | 0.000507  |
| 17               | 6                | 0              | -3.172222               | -1.116199 | 0.000038  |
| 18               | 1                | 0              | -1.316128               | -2.085280 | -0.000095 |
| 19               | 8                | 0              | -3.860323               | 0.051301  | 0.000043  |
| 20               | 1                | 0              | 3.051427                | -3.002900 | -0.000969 |
| 21               | 6                | 0              | 1.186293                | -0.917155 | -0.000224 |
| 22               | 1                | 0              | 0.767253                | -1.921916 | -0.000515 |
| 23               | 6                | 0              | 0.317748                | 0.183711  | 0.000115  |
| 24               | 1                | 0              | 0.750223                | 1.182303  | 0.000345  |
| 25               | 6                | 0              | -4.190541               | 2.399153  | -0.000256 |
| 26               | 6                | 0              | -5.069980               | 2.297837  | -1.258838 |
| 27               | 6                | 0              | -5.073259               | 2.296501  | 1.255896  |
| 28               | 6                | 0              | -3.449375               | 3.736837  | 0.001444  |
| 29               | 1                | 0              | -4.461470               | 2.355419  | -2.166898 |
| 30               | 1                | 0              | -5.632583               | 1.360281  | -1.273815 |
| 31               | 1                | 0              | -5.783606               | 3.127524  | -1.268748 |
| 32               | 1                | 0              | -4.467099               | 2.352513  | 2.165624  |
| 33               | 1                | 0              | -5.786434               | 3.126578  | 1.265105  |
| 34               | 1                | 0              | -5.636454               | 1.359270  | 1.268081  |
| 35               | 1                | 0              | -4.180870               | 4.550066  | 0.001281  |
| 36               | 1                | 0              | -2.822260               | 3.846828  | 0.892026  |
| 37               | 1                | 0              | -2.820437               | 3.848206  | -0.887678 |
| 38               | 6                | 0              | -4.105133               | -2.304999 | 0.000356  |
| 39               | 6                | 0              | -4.987224               | -2.234031 | 1.259246  |
| 40               | 6                | 0              | -4.990622               | -2.232327 | -1.256029 |
| 41               | 6                | 0              | -3.319573               | -3.617295 | -0.001600 |
| 42               | 1                | 0              | -4.376715               | -2.271058 | 2.166994  |
| 43               | 1                | 0              | -5.580851               | -1.315976 | 1.274578  |
| 44               | 1                | 0              | -5.672456               | -3.087255 | 1.269244  |
| 45               | 1                | 0              | -4.382557               | -2.267643 | -2.165487 |
| 46               | 1                | 0              | -5.675517               | -3.085823 | -1.265567 |
| 47               | 1                | 0              | -5.584699               | -1.314521 | -1.268244 |
| 48               | 1                | 0              | -4.023314               | -4.454520 | -0.001424 |
| 49               | 1                | 0              | -2.689658               | -3.706584 | -0.892590 |
| 50               | 1                | 0              | -2.687558               | -3.708041 | 0.887753  |



E(RM062X) = -1435.18246040 A.U.

**1c**

Standard orientation:

| Center Number | Atomic Number | Atomic Type | Coordinates (Angstroms) |           |           |
|---------------|---------------|-------------|-------------------------|-----------|-----------|
|               |               |             | X                       | Y         | Z         |
| 1             | 6             | 0           | 6.311625                | -0.193832 | -0.000088 |
| 2             | 6             | 0           | 6.183395                | -1.614831 | -0.000206 |
| 3             | 6             | 0           | 4.881072                | -2.032647 | -0.000258 |
| 4             | 6             | 0           | 3.921272                | -0.985342 | -0.000184 |
| 5             | 1             | 0           | 7.049735                | -2.264958 | -0.000247 |
| 6             | 16            | 0           | 4.749233                | 0.577657  | -0.000045 |
| 7             | 6             | 0           | 7.498000                | 0.534921  | -0.000012 |
| 8             | 6             | 0           | 8.748106                | -0.140433 | -0.000047 |
| 9             | 7             | 0           | 9.757774                | -0.714393 | -0.000077 |
| 10            | 6             | 0           | 7.487734                | 1.954352  | 0.000101  |
| 11            | 7             | 0           | 7.438233                | 3.115028  | 0.000193  |
| 12            | 6             | 0           | -2.125347               | 0.370972  | -0.000014 |
| 13            | 6             | 0           | -3.062621               | 1.465923  | 0.000150  |
| 14            | 6             | 0           | -2.727954               | -0.939507 | -0.000159 |
| 15            | 6             | 0           | -4.396052               | 1.252109  | 0.000189  |
| 16            | 1             | 0           | -2.687848               | 2.481936  | 0.000249  |
| 17            | 6             | 0           | -4.070799               | -1.088197 | -0.000123 |
| 18            | 1             | 0           | -2.113917               | -1.829305 | -0.000296 |
| 19            | 8             | 0           | -4.896610               | -0.010883 | 0.000070  |
| 20            | 1             | 0           | 4.573644                | -3.073215 | -0.000348 |
| 21            | 6             | 0           | 2.553904                | -1.131667 | -0.000210 |
| 22            | 6             | 0           | 1.595122                | -0.100904 | -0.000124 |
| 23            | 1             | 0           | 2.188927                | -2.158883 | -0.000299 |
| 24            | 1             | 0           | 1.927537                | 0.936256  | -0.000009 |
| 25            | 6             | 0           | 0.243607                | -0.367835 | -0.000141 |
| 26            | 6             | 0           | -0.762115               | 0.617065  | -0.000019 |
| 27            | 1             | 0           | -0.049486               | -1.417169 | -0.000248 |
| 28            | 1             | 0           | -0.443925               | 1.657372  | 0.000093  |
| 29            | 6             | 0           | -5.501075               | 2.281939  | 0.000358  |
| 30            | 6             | 0           | -6.363747               | 2.075464  | -1.257068 |
| 31            | 6             | 0           | -6.363788               | 2.075013  | 1.257681  |
| 32            | 6             | 0           | -4.926267               | 3.699496  | 0.000620  |
| 33            | 1             | 0           | -5.768058               | 2.209534  | -2.165530 |
| 34            | 1             | 0           | -6.804790               | 1.075005  | -1.273471 |
| 35            | 1             | 0           | -7.175344               | 2.809641  | -1.265320 |
| 36            | 1             | 0           | -5.768125               | 2.208742  | 2.166210  |
| 37            | 1             | 0           | -7.175376               | 2.809195  | 1.266177  |
| 38            | 1             | 0           | -6.804842               | 1.074552  | 1.273702  |
| 39            | 1             | 0           | -5.750031               | 4.419060  | 0.000731  |
| 40            | 1             | 0           | -4.315942               | 3.884766  | 0.890249  |
| 41            | 1             | 0           | -4.315907               | 3.885080  | -0.888920 |
| 42            | 6             | 0           | -4.857012               | -2.379140 | -0.000174 |
| 43            | 6             | 0           | -5.743324               | -2.412316 | 1.257313  |
| 44            | 6             | 0           | -5.743326               | -2.412253 | -1.257659 |
| 45            | 6             | 0           | -3.923629               | -3.591008 | -0.000206 |
| 46            | 1             | 0           | -5.133426               | -2.380821 | 2.165721  |
| 47            | 1             | 0           | -6.437453               | -1.567651 | 1.273559  |
| 48            | 1             | 0           | -6.327179               | -3.337943 | 1.265897  |
| 49            | 1             | 0           | -5.133436               | -2.380639 | -2.166069 |
| 50            | 1             | 0           | -6.327119               | -3.337918 | -1.266322 |
| 51            | 1             | 0           | -6.437512               | -1.567637 | -1.273831 |
| 52            | 1             | 0           | -4.525135               | -4.504509 | -0.000279 |
| 53            | 1             | 0           | -3.286248               | -3.607166 | -0.890116 |
| 54            | 1             | 0           | -3.286321               | -3.607273 | 0.889753  |

E(RM062X) = -1512.55019014 A.U.

2

Standard orientation:

| Center<br>Number | Atomic<br>Number | Atomic<br>Type | Coordinates (Angstroms) |           |           |
|------------------|------------------|----------------|-------------------------|-----------|-----------|
|                  |                  |                | X                       | Y         | Z         |
| 1                | 6                | 0              | 1.881843                | 1.070360  | -0.023891 |
| 2                | 6                | 0              | 0.847085                | 0.202909  | -0.036986 |
| 3                | 6                | 0              | 1.064110                | -1.226780 | -0.018695 |
| 4                | 6                | 0              | 2.460811                | -1.610077 | 0.000242  |
| 5                | 6                | 0              | 3.449216                | -0.694163 | 0.014310  |
| 6                | 1                | 0              | -0.146051               | 0.622024  | -0.069796 |
| 7                | 1                | 0              | 2.715625                | -2.662855 | 0.006554  |
| 8                | 8                | 0              | 3.167616                | 0.640068  | 0.007907  |
| 9                | 6                | 0              | 0.094321                | -2.201218 | -0.021302 |
| 10               | 1                | 0              | 0.443940                | -3.231093 | -0.018639 |
| 11               | 6                | 0              | -1.327734               | -2.089491 | -0.026159 |
| 12               | 6                | 0              | -2.195072               | -3.188614 | -0.049687 |
| 13               | 16               | 0              | -2.239305               | -0.607457 | 0.005529  |
| 14               | 6                | 0              | -3.541197               | -2.838169 | -0.046404 |
| 15               | 1                | 0              | -1.825877               | -4.206989 | -0.069920 |
| 16               | 6                | 0              | -3.766308               | -1.462160 | -0.017634 |
| 17               | 1                | 0              | -4.359021               | -3.550930 | -0.064771 |
| 18               | 6                | 0              | 4.940022                | -0.937946 | 0.037326  |
| 19               | 6                | 0              | 5.249197                | -2.435956 | 0.044339  |
| 20               | 6                | 0              | 5.562799                | -0.290330 | -1.211586 |
| 21               | 6                | 0              | 5.525983                | -0.286178 | 1.301674  |
| 22               | 1                | 0              | 4.829551                | -2.928089 | 0.927721  |
| 23               | 1                | 0              | 4.858999                | -2.930240 | -0.851250 |
| 24               | 1                | 0              | 6.333752                | -2.577656 | 0.062616  |
| 25               | 1                | 0              | 5.375372                | 0.786839  | -1.232241 |
| 26               | 1                | 0              | 6.645426                | -0.451809 | -1.204546 |
| 27               | 1                | 0              | 5.153841                | -0.732828 | -2.125583 |
| 28               | 1                | 0              | 6.608873                | -0.444349 | 1.324665  |
| 29               | 1                | 0              | 5.334768                | 0.790436  | 1.315199  |
| 30               | 1                | 0              | 5.093485                | -0.728495 | 2.204870  |
| 31               | 6                | 0              | 1.804333                | 2.579843  | -0.040962 |
| 32               | 6                | 0              | 2.554970                | 3.094697  | -1.281287 |
| 33               | 6                | 0              | 0.350704                | 3.055816  | -0.088204 |
| 34               | 6                | 0              | 2.480520                | 3.118614  | 1.231654  |
| 35               | 1                | 0              | 3.605674                | 2.792242  | -1.260836 |
| 36               | 1                | 0              | 2.099548                | 2.711920  | -2.200248 |
| 37               | 1                | 0              | 2.511880                | 4.188147  | -1.305017 |
| 38               | 1                | 0              | -0.213526               | 2.720223  | 0.788159  |
| 39               | 1                | 0              | 0.333228                | 4.149498  | -0.100285 |
| 40               | 1                | 0              | -0.160947               | 2.701096  | -0.989026 |
| 41               | 1                | 0              | 2.445596                | 4.212616  | 1.226735  |
| 42               | 1                | 0              | 1.964218                | 2.761318  | 2.128404  |
| 43               | 1                | 0              | 3.527587                | 2.807595  | 1.284295  |
| 44               | 6                | 0              | -5.046614               | -0.871101 | -0.009085 |
| 45               | 6                | 0              | -5.405224               | 0.456001  | 0.025218  |
| 46               | 1                | 0              | -5.870242               | -1.582044 | -0.032661 |
| 47               | 6                | 0              | -4.462839               | 1.528510  | 0.064818  |
| 48               | 7                | 0              | -3.694997               | 2.397466  | 0.098640  |
| 49               | 6                | 0              | -6.786829               | 0.822208  | 0.025270  |
| 50               | 7                | 0              | -7.908196               | 1.117040  | 0.025083  |

E(RM062X) = -1435.18520382 A.U.
